# Supplementary material
Source: PubMed Central journal article supplement (PMC7964362)
Supplement: 2572_materials.pdf [file 2572_materials.pdf]

**On-line Table. Baseline demographics, angiographic, and clinical characteristics of patients who experienced coil prolapse associated with embolization with follow-up data**

| Patient No. | Age (yr)/Sex | Aneurysm Location    | Initial Protrusion Grade | Last Follow-Up Protrusion Grade | SAH Grade | Size of Aneurysm | Medical Treatment                                                     | Endovascular Treatment               | Coils Used <sup>a</sup>                                                        | Discharge mRS | Events at 1 mo                           | Follow-Up Angiogram (mo) | mRS at 6 mo | Length of Follow-Up (mo) | Events during Follow-Up | mRS at Last Contact |
|-------------|--------------|----------------------|--------------------------|---------------------------------|-----------|------------------|-----------------------------------------------------------------------|--------------------------------------|--------------------------------------------------------------------------------|---------------|------------------------------------------|--------------------------|-------------|--------------------------|-------------------------|---------------------|
| 1           | 40/F         | L ICA paraophthalmic | II                       | II                              | HH 4      | 13 × 11 mm       | Aspirin, 325 mg × 1 mo, Aspirin 81 mg indefinitely, enoxaparin × 6 mo | Rescue balloon, HyperGlide 4 × 10 mm | 13 (3 GDC, 6 Matrix, 4 HydroCoil)                                              | 4             | ICH due to therapeutic heparin (day 20)  | 18                       | 2           | 18                       | None                    | 1                   |
| 2           | 33/M         | AcomA                | II                       | II                              | HH 1      | 4.5 × 4.5 mm     | Aspirin 325 mg indefinitely                                           | None                                 | 3 (GDC)                                                                        | 3             | None                                     | 12                       | 2           | 12                       | None                    | 1                   |
| 3           | 48/M         | L ICA                | I                        | 0                               | HH 1      | 12 × 9 mm        | Aspirin 325 mg × 1 mo, clopidogrel 75 mg × 5 days                     | None                                 | 6 (3 Cashmere, 2 Ultipa, 1 Presidio)                                           | 1             | None                                     | 6                        | 0           | 6                        | None                    | 0                   |
| 4           | 39/M         | AcomA                | I                        | I                               | HH 1      | 8.5 × 10.5 mm    | Aspirin 325 mg × 1 mo                                                 | None                                 | 19 (4 Cashmere, 4 Micrusphere, 8 Ultipa, 1 Presidio, 1 HydroCoil, 1 Hydrosort) | 1             | None                                     | Unknown                  | 1           | 18                       | None                    | 0                   |
| 5           | 52/F         | Basilar              | I                        | I                               | HH 3      | 2.5 × 3.5 mm     | Aspirin 325 mg × 21 days                                              | None                                 | 4 (2 MicroPlex, 1 Hypersoft, 1 helical HydroCoil)                              | 6             | Ischemic stroke on day 8, died on day 21 | N/A                      | N/A         | N/A                      | N/A                     | 6                   |
| 6           | 48/M         | AcomA                | I                        | I                               | HH 5      | 12 × 8 mm        | Abciximab IA, aspirin 325 mg × 5 days, clopidogrel 300 mg × 1         | None                                 | 14 (6 Cashmere, 8 Ultipa)                                                      | 6             | Ischemic stroke on day 2, died on day 5  | N/A                      | N/A         | N/A                      | N/A                     | 6                   |
| 7           | 51/F         | AcomA                | III                      | III                             | HH 5      | 13.5 × 10 mm     | Eptifibatid IA, aspirin 325 mg × 4 days, clopidogrel 75 mg × 4 days   | None                                 | 6 (3 Cashmere, 2 Deltapaq, 1 Ultipa)                                           | 6             | Ischemic stroke on day 3, died on day 4  | N/A                      | N/A         | N/A                      | N/A                     | 6                   |
| 8           | 46/F         | R ACA                | I                        | I                               | HH 3      | 3.5 × 3.5 mm     | Aspirin 325 mg indefinitely                                           | None                                 | 2 (1 MicroPlex, 1 Hypersoft)                                                   | 2             | None                                     | 18                       | 1           | 18                       | None                    | 0                   |
| 9           | 55/M         | AcomA                | III                      | III                             | HH 1      | 6 × 3 mm         | Aspirin 325 mg indefinitely, clopidogrel 75 mg × 1 mo                 | Enterprise stent, 4.5 × 22 mm        | 3 Orbit Mini Complex                                                           | 2             | None                                     | 6                        | 1           | 6                        | None                    | 1                   |
| 10          | 42/F         | L ICA paraophthalmic | II                       | II                              | HH 3      | 8 × 6 mm         | Aspirin 325 mg indefinitely, clopidogrel 75 mg × 3 months             | Neuroform stent 4.5 × 20 mm          | 5 (3 Cashmere, 2 Ultipa)                                                       | 3             | None                                     | N/A                      | 6           | 5                        | Died on day 150         | 6                   |
| 11          | 55/F         | AcomA                | I                        | I                               | HH 3      | 9 × 4 mm         | Eptifibatid IV, aspirin 325 mg × 1 mo, aspirin 81 mg indefinitely     | Rescue balloon, Hyperform, 4 × 7 mm  | 4 (Micrus, Cerecye, Ultipa, Cashmere)                                          | 1             | None                                     | 3                        | 0           | 15                       | None                    | 0                   |
| 12          | 72/F         | L pericallosal       | III                      | III                             | HH 3      | 2 × 3 mm         | Aspirin 325 mg × 7 days                                               | None                                 | 4 (3 Hypersoft, 1 Ultipa)                                                      | 6             | Ischemic stroke on day 4, died on day 7  | None                     | N/A         | N/A                      | N/A                     | 6                   |
| 13          | 42/F         | L ICA                | I                        | I                               | HH 1      | 4.5 × 6 mm       | Aspirin 325 mg indefinitely, clopidogrel 75 mg × 3 mos                | None                                 | 4 (2 GDC, 1 Ultipa, 1 MicroCoil)                                               | 3             | None                                     | 6                        | 1           | 12                       | None                    | 1                   |
| 14          | 43/F         | L ACA                | III                      | 0                               | HH 3      | 8 × 6 mm         | Aspirin 325 mg indefinitely, clopidogrel 75 mg × 3 months             | Neuroform stent, 4.5 × 20 mm         | 6 (MicroPlex, 4 HydroCoil)                                                     | 3             | None                                     | 4                        | N/A         | 4                        | None                    | 1                   |
| 15          | 49/F         | R ICA supraclinoid   | I                        | I                               | HH 2      | 5 × 4 mm         | Aspirin 325 mg indefinitely, clopidogrel 75 mg × 3 mo                 | Neuroform stent, 4.5 × 15 mm         | 4 Matrix                                                                       | 1             | None                                     | 12                       | 1           | 12                       | None                    | 0                   |
| 16          | 34/F         | AcomA                | II                       | II                              | HH 1      | 7 × 4 mm         | Aspirin 325 mg indefinitely                                           | None                                 | 6 Matrix                                                                       | 1             | None                                     | 3                        | N/A         | 3                        | None                    | 0                   |
| 17          | 48/F         | R ICA supraclinoid   | III                      | III                             | HH 3      | 3 × 4 mm         | Aspirin 325 mg indefinitely, clopidogrel 75 mg × 12 mo                | Neuroform stent, 4 × 20 mm           | 2 Matrix                                                                       | 2             | None                                     | 48                       | 1           | 48                       | None                    | 0                   |
| 18          | 60/F         | L paraophthalmic     | III                      | III                             | HH 3      | 6 × 5 mm         | Aspirin 325 mg indefinitely, clopidogrel 75 mg × 6 mo                 | Neuroform stent, 4.5 × 20 mm         | 2 Micrus                                                                       | 1             | None                                     | 6                        | 0           | 6                        | None                    | 0                   |
| 19          | 41/F         | L PcomA              | I                        | I                               | HH 4      | 3 × 2 mm         | None                                                                  | None                                 | 1 Matrix                                                                       | 2             | None                                     | 24                       | 0           | 24                       | None                    | 0                   |
| 19          | 41/F         |                      | I                        | I                               |           |                  |                                                                       |                                      |                                                                                |               |                                          |                          |             |                          |                         |                     |

**Note:**—The grading scheme was used as illustrated in Fig 1.  
<sup>a</sup> Cashmere (Micrus), Ultipa (Micrus), Deltapaq (Micrus), Presidio (Micrus), MicroPlex (MicroVention), Hydrosort (MicroVention), and Hypersoft (MicroVention), Cerecye (Micrus), HyperGlide (ev3), HyperForm (ev3).

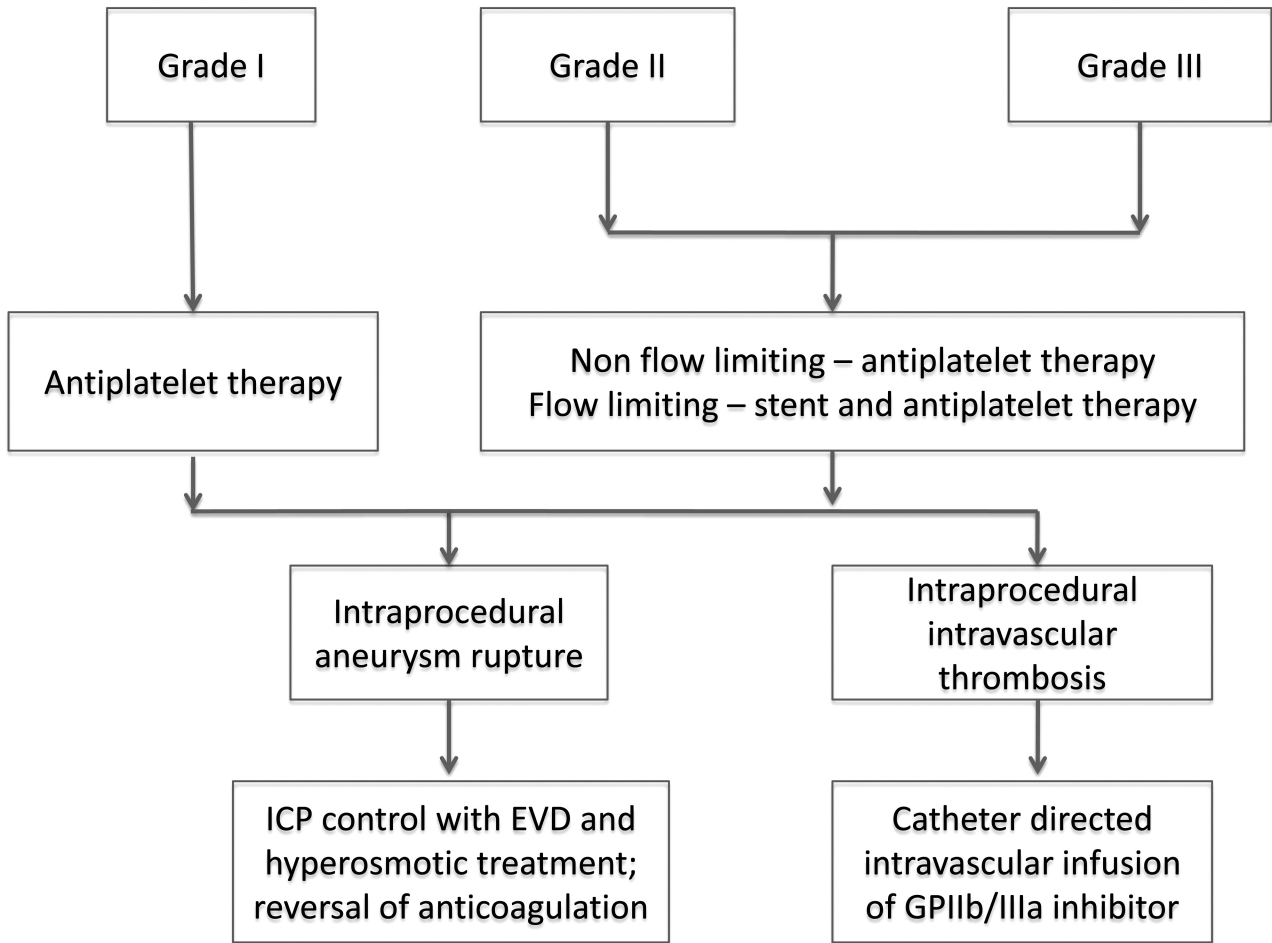

**On-line Figure.** Flow chart. EVD indicates external ventricular drainage.
